# Supplementary material
Source: Research Square preprint supplement (doi:10.21203/rs.3.rs-7669354/v2)
Supplement: Supplementary file 1 [file 349ce1c068c11f75a8480133.pdf]

Supplementary Material 4

Inductive content analysis of free text responses with selected quotes

| <b>Question – Do you have any feedback for us regarding the CMV study so far?</b> |                                                                                                                                                                                                                                                                                                                                                                                                                   |
|-----------------------------------------------------------------------------------|-------------------------------------------------------------------------------------------------------------------------------------------------------------------------------------------------------------------------------------------------------------------------------------------------------------------------------------------------------------------------------------------------------------------|
| Time point – T2 (15-20 weeks' gestation)                                          |                                                                                                                                                                                                                                                                                                                                                                                                                   |
| Categories                                                                        | Example quotes                                                                                                                                                                                                                                                                                                                                                                                                    |
| CMV awareness                                                                     | <i>"Super grateful for all the advice and information, thank you"</i>                                                                                                                                                                                                                                                                                                                                             |
| Reassurance                                                                       | <i>"It was good to be able to be screened for CMV as part of the antenatal testing and to receive information about it prior as to why it would be important to be aware if you test positive or not and what this could mean in your pregnancy and the support that can be provided."</i>                                                                                                                        |
| Convenience                                                                       | <i>"The pathology department would not accept an electronic copy..."</i><br><i>"The pathology form would have been easier via mail than email..."</i><br><i>"Make it so the blood test can be performed anywhere..."</i>                                                                                                                                                                                          |
| Ambivalence                                                                       | <i>"I'm still unsure how this study will have a positive health impact. I understand that the intent is to look at the feasibility of routine testing for CMV at 10-13 weeks, however I can't see how this helps as a positive result won't tell you if the infection is new, when it occurred or provide a means for treatment. Is this just to allow for further screening for ill effects down the track?"</i> |

*“Probably not overly necessary to receive the results ONLY over the phone. Having to speak to someone about results generally indicates there is a problem so can be slightly triggering*

**Question - Describe how getting tested for CMV early in pregnancy impacted your pregnancy experience**

Timepoint – T3 (3-6 weeks postpartum)

|            |                    |
|------------|--------------------|
| Categories | Free text response |
|------------|--------------------|

|               |                                                                                                                                                                     |
|---------------|---------------------------------------------------------------------------------------------------------------------------------------------------------------------|
| CMV awareness | <p><i>“Made me aware more about CMV and hygiene.”</i></p> <p><i>“It was good to know about my immunity and potential risks of getting CMV during pregnancy”</i></p> |
|---------------|---------------------------------------------------------------------------------------------------------------------------------------------------------------------|

|             |                                                                                                                                                                                         |
|-------------|-----------------------------------------------------------------------------------------------------------------------------------------------------------------------------------------|
| Reassurance | <p><i>“While it wasn't something I had heard about before pregnancy, the testing process and a good result helped with anxiety and managing expectations through my pregnancy.”</i></p> |
|-------------|-----------------------------------------------------------------------------------------------------------------------------------------------------------------------------------------|

*“Very relieved that I did not have CMV.”*

*“It eased my mind having a toddler in the house already.”*

|             |                                                                         |
|-------------|-------------------------------------------------------------------------|
| Convenience | <p><i>“It was very simple and didn't feel like any extra work.”</i></p> |
|-------------|-------------------------------------------------------------------------|

*“Didn't impact it at all. Very easy and simple to do.”*

|             |                                                                                                                                                       |
|-------------|-------------------------------------------------------------------------------------------------------------------------------------------------------|
| Ambivalence | <p><i>“At this point in time I'm not sure whether it would add stress, as there isn't anything that can be done if the results are positive.”</i></p> |
|-------------|-------------------------------------------------------------------------------------------------------------------------------------------------------|

**Question – Why would you recommend CMV testing to a pregnant friend or colleague?**

Time point – T3 (3-6 weeks postpartum)

Categories

Free text response

CMV awareness

*“It was good to know more about CMV and be screened. While I was negative, if I had been positive, I would have been in a better position, and it was helpful to know how to minimise risk in early pregnancy.”*

*“Has benefits to the health outcomes of your baby if found to have CMV.”*

*“This is so important to know in pregnancy to be monitored and if positive to support the best outcome for the child. I have a friend with a CMV-affected child.”*

Reassurance

*“Peace of mind knowing I didn't have it and if I did the option to get treatment right away was comforting.”*

*“It was reassuring to be provided with information and be educated about CMV and how it can affect pregnancy and measures in place if it was positive.”*

Convenience

*“Non-invasive, low burden. Very easy to do alongside other blood tests/investigations.”*

*I think it should be part of the standard bloods that are taken throughout pregnancy or at least in the first trimester”*

Ambivalence

*“At this point in time I'm not sure whether it would add additional stress as there isn't anything that can be done if the results are positive.”*

*“Although my results were negative, I did wonder what I would do if they came back positive and know it isn't totally clear what can be done. Had my result been positive, I think this would have created anxiety in my pregnancy, hence why I'm unsure whether I would recommend.”*

*“I would definitely recommend for friends who might be concerned or have additional risk, otherwise maybe not.”*

**Question – Do you have any final feedback for us about this study?**

Time point – T3 (3-6 weeks postpartum)

Categories

CMV awareness *“I truly hope this will become a standard practice of care so everyone is informed and can ensure they are able to keep themselves safe.”*

Reassurance *“I’m happy with my experience. The test result was negative and it helped me to remove unnecessary worries.”*  
*“I was well informed about the study prior to it commencing and during – keep up the great levels of communication!!”*  
*“This is a great study and brought me comfort knowing I was being monitored especially being a nurse working with sick children.”*

Convenience *The option to go to another pathology provider closer to home would have been very helpful but appreciate why this wasn't possible.”*

Ambivalence *“I appreciate the importance of CMV infection prevention in pregnancy however I am also conscious of how stressful pregnancy is at the best of times. One is worried about doing the right thing and of things going wrong. This worry is potentially exacerbated by all the screening tests conducted, especially if there isn't anything that can be done if a test returns a negative result. Thus, I put forward does screening cause additional harm (especially psychological/emotional) that outweighs any benefit from the results generated?”*

*“I am still unsure how this study will have a positive health impact. I understand that the intent is to test feasibility, but a positive result doesn't tell you if the infection is new, when it occurred, or provide a treatment option. Is this just to allow for further screening down the track?”*
